# Supplementary material
Source: PubMed Central journal article supplement (PMC9384591)
Supplement: sup_table_taac088.pdf [file sup_table_taac088.pdf]

Sup. Table 1

|                    | All individuals           |                           |                           |                           |
|--------------------|---------------------------|---------------------------|---------------------------|---------------------------|
| Time Points        | SARS-CoV-2 IgG (N) pValue | SARS-CoV-2 IgG (S) pValue | SARS-CoV-2 IgA (N) pValue | SARS-CoV-2 IgA (S) pValue |
| Day 0 vs. Month 1  | <0.0001                   | <0.0001                   | >0.9999                   | >0.9999                   |
| Day 0 vs. Month 2  | <0.0001                   | <0.0001                   | 0.0189                    | <0.0001                   |
| Day 0 vs. Month 3  | <0.0001                   | <0.0001                   | 0.0428                    | <0.0001                   |
| Day 0 vs. Month 4  | <0.0001                   | <0.0001                   | not tested                | not tested                |
| Day 0 vs. Month 6  | <0.0001                   | <0.0001                   | 0.0701                    | 0.1506                    |
| Day 0 vs. Month 12 | <0.0001                   | <0.0001                   | >0.9999                   | >0.9999                   |

|                    | Prior Infection           |                           |                           |                           |
|--------------------|---------------------------|---------------------------|---------------------------|---------------------------|
| Time Points        | SARS-CoV-2 IgG (N) pValue | SARS-CoV-2 IgG (S) pValue | SARS-CoV-2 IgA (N) pValue | SARS-CoV-2 IgA (S) pValue |
| Day 0 vs. Month 1  | 0.4065                    | 0.1018                    | >0.9999                   | >0.9999                   |
| Day 0 vs. Month 2  | <0.0001                   | 0.0007                    | >0.9999                   | <0.0001                   |
| Day 0 vs. Month 3  | 0.4065                    | 0.1018                    | >0.9999                   | >0.9999                   |
| Day 0 vs. Month 4  | >0.9999                   | >0.9999                   | not tested                | not tested                |
| Day 0 vs. Month 6  | >0.9999                   | >0.9999                   | >0.9999                   | 0.2659                    |
| Day 0 vs. Month 12 | 0.0002                    | <0.0001                   | 0.4257                    | >0.9999                   |

|                    | No-Prior Infection        |                           |                           |                           |
|--------------------|---------------------------|---------------------------|---------------------------|---------------------------|
| Time Points        | SARS-CoV-2 IgG (N) pValue | SARS-CoV-2 IgG (S) pValue | SARS-CoV-2 IgA (N) pValue | SARS-CoV-2 IgA (S) pValue |
| Day 0 vs. Month 1  | <0.0001                   | <0.0001                   | >0.9999                   | >0.9999                   |
| Day 0 vs. Month 2  | <0.0001                   | <0.0001                   | 0.0303                    | <0.0001                   |
| Day 0 vs. Month 3  | <0.0001                   | <0.0001                   | 0.0248                    | <0.0001                   |
| Day 0 vs. Month 4  | <0.0001                   | <0.0001                   | not tested                | not tested                |
| Day 0 vs. Month 6  | <0.0001                   | <0.0001                   | 0.0085                    | <0.0001                   |
| Day 0 vs. Month 12 | <0.0001                   | <0.0001                   | >0.9999                   | >0.9999                   |

Supplementary Table 1: p values for all the binding antibodies at all time points

Sup. Table 2

| All individuals    |                                   |                               |                                     |                              |                               |                                 |
|--------------------|-----------------------------------|-------------------------------|-------------------------------------|------------------------------|-------------------------------|---------------------------------|
| Time Points        | SARS-CoV-2 Nab (Wild type) pValue | SARS-CoV-2 Nab (Delta) pValue | SARS-CoV-2 Nab (Delta plus ) pValue | SARS-CoV-2 Nab (Beta) pValue | SARS-CoV-2 Nab (Alpha) pValue | SARS-CoV-2 Nab (Omicron) pValue |
| Day 0 vs. Month 3  | <0.0001                           | <0.0001                       | <0.0001                             | <0.0001                      | <0.0001                       | 0.8426                          |
| Day 0 vs. Month 6  | <0.0001                           | <0.0001                       | <0.0001                             | <0.0001                      | <0.0001                       | <0.0001                         |
| Day 0 vs. Month 12 | <0.0001                           | <0.0001                       | <0.0001                             | <0.0001                      | <0.0001                       | <0.0001                         |
| Prior Infection    |                                   |                               |                                     |                              |                               |                                 |
| Time Points        | SARS-CoV-2 Nab (Wild type) pValue | SARS-CoV-2 Nab (Delta) pValue | SARS-CoV-2 Nab (Delta plus ) pValue | SARS-CoV-2 Nab (Beta) pValue | SARS-CoV-2 Nab (Alpha) pValue | SARS-CoV-2 Nab (Omicron) pValue |
| Day 0 vs. Month 3  | 0.0013                            | 0.0005                        | 0.0009                              | 0.0011                       | 0.0009                        | not tested                      |
| Day 0 vs. Month 6  | 0.4542                            | 0.0766                        | 0.0549                              | 0.0038                       | 0.0192                        | 0.2721                          |
| Day 0 vs. Month 12 | <0.0001                           | 0.0002                        | 0.0001                              | <0.0001                      | 0.0003                        | 0.001                           |
| No-Prior Infection |                                   |                               |                                     |                              |                               |                                 |
| Time Points        | SARS-CoV-2 Nab (Wild type) pValue | SARS-CoV-2 Nab (Delta) pValue | SARS-CoV-2 Nab (Delta plus ) pValue | SARS-CoV-2 Nab (Beta) pValue | SARS-CoV-2 Nab (Alpha) pValue | SARS-CoV-2 Nab (Omicron) pValue |
| Day 0 vs. Month 3  | <0.0001                           | <0.0001                       | <0.0001                             | <0.0001                      | <0.0001                       | not tested                      |
| Day 0 vs. Month 6  | <0.0001                           | <0.0001                       | <0.0001                             | <0.0001                      | <0.0001                       | 0.0372                          |
| Day 0 vs. Month 12 | <0.0001                           | <0.0001                       | <0.0001                             | <0.0001                      | <0.0001                       | 0.0016                          |

Supplementary Table 2: p values for all the neutralizing antibodies at all time points
